# Supplementary material
Source: Research Square preprint supplement (doi:10.21203/rs.3.rs-9003469/v1)
Supplement: Supplementary file 1 [file 7f75d48671cde7bb6946f838.docx]

| Table 1 – Preoperative Demographic Variables | | | |
| --- | --- | --- | --- |
|  | After-Hours | Regular-Hours | Total| p-Value |
| **Patients (n)** | 65 | 96 |  |
| **Age (years)** | 57 (54 ± 18) | 61 (57 ± 18) | 0.208 |
| **Sex (M/F)** | 20/45 | 34/62 | 0.540 |
| **BMI (kg/m2)** | 31 (31 ± 6.5) | 30 (30 ± 6.7) | 0.578 |
| **ASA** **(1-6)** | 3 (3 ± 1) | 3 (3 ± 1) | 0.757 |
| **Prior Abdominal Procedure (n)** | 33 | 34 | 0.053 |
| **Cirrhosis (n)** | 4 | 9 | 0.462 |
