# Supplementary material
Source: Research Square preprint supplement (doi:10.21203/rs.3.rs-9003469/v1)
Supplement: Supplementary file 2 [file b4abc426951c19055cb6c5cb.docx]

| Table 2 – Preoperative Laboratory Variables | | | |
| --- | --- | --- | --- |
|  | After-Hours | Regular-Hours | Total| p-Value |
| **Patients (n)** | 65 | 96 | 161 |
| **WBC (x 103.µL-1)** | 8.8 (10 ± 5.5) | 8.9 (10 ± 5.6) | 0.923 |
| **Neutrophil Percentage (%)** | 70 (71 ± 18) | 73 (72 ± 29) | 0.592 |
| **Glucose (mg.dL-1)** | 115 (146 ± 79) | 111 (126 ± 54) | 0.058 |
| **Creatinine (mg.dL-1)** | 0.8 (1.1 ± 0.9) | 0.9 (1.0 ± 0.7) | 0.576 |
| **Alanine Transaminase (IU.dL-1)** | 35 (129 ± 188) | 80 (160 ± 196) | 0.372 |
| **Aspartate Transaminase (IU.dL-1)** | 26 (99 ± 186) | 65 (120 ± 149) | 0.478 |
| **Alkaline Phosphatase (IU.dL-1)** | 88 (131 ± 114) | 124 (192 ± 184) | **0.027** |
| **Total Bilirubin (mg.dL-1)** | 0.8 (1.5 ± 2.3) | 1.2 (2.1 ± 2.1) | 0.109 |
| *Values listed as median ± standard deviation where applicable* | | | |
