# Supplementary material
Source: Research Square preprint supplement (doi:10.21203/rs.3.rs-9003469/v1)
Supplement: Supplementary file 3 [file c4f7ddc63ae680aae7ee50a5.docx]

| Table 3 – Postoperative Variables | | | |
| --- | --- | --- | --- |
|  | After-Hours | Regular-Hours | Total| p-Value |
| **Patients (n)** | 65 | 96 | 161 |
| **Operative Time (min)** | 70 (69 ± 27) | 67 (79 ± 40) | 0.075 |
| **Estimated Blood Loss (ml)** | 25 (43 ± 75) | 18 (53 ± 84) | 0.428 |
| **Intravenous Fluids (IVF) Given (ml)** | 1000 (935 ± 359) | 1000 (1015 ± 555) | 0.311 |
| **Conversion to ‘open’** | 0 | 0 | N/A |
| **Length of Stay (days)** | 1.0 (1.8 ± 1.6) | 1.0 (1.7 ± 2.1) | 0.818 |
| **Complications** | 3 (II, III, III) | 3 (III, III, III) | 0.624 |
| **30-day Readmission** | 3/65 | 3/96 | 0.624 |
| **30-day Mortality** | 0 | 0 | N/A |
| *Values listed as median ± standard deviation where applicable* | | | |
