# Supplementary material
Source: Research Square preprint supplement (doi:10.21203/rs.3.rs-9003469/v1)
Supplement: Supplementary file 4 [file cd3e524acde34398ca2f5dcf.docx]

| Table 4 – Pathology | | | |
| --- | --- | --- | --- |
|  | After hours | Regular hours | p-value |
| **Acute Cholecystitis** | 38/65 | 49/96 | 0.354 |
| **Chronic Cholecystitis** | 65/65 | 94/96 | 0.242 |
| **Necrotizing / Empyema Cholecystitis** | 10/65 | 14/96 | 0.889 |
